# Supplementary material for: Evaluating aerosol and splatter following dental procedures: addressing new challenges for oral healthcare and rehabilitation
Source: bioRxiv or medRxiv preprint supplement (doi:10.1101/2020.06.25.154401), 2020-07-01
Supplement: Supplementary file [file media-1.pdf]

# Evaluating aerosol and splatter following dental procedures: addressing new challenges for oral healthcare and rehabilitation

Allison JR, Currie CC, Edwards DC, Bowes C, Coulter J, Pickering K, Kozhevnikova E, Durham J, Nile CJ, Jakubovics N, Rostami N, Holliday R

## Supplementary Data S1

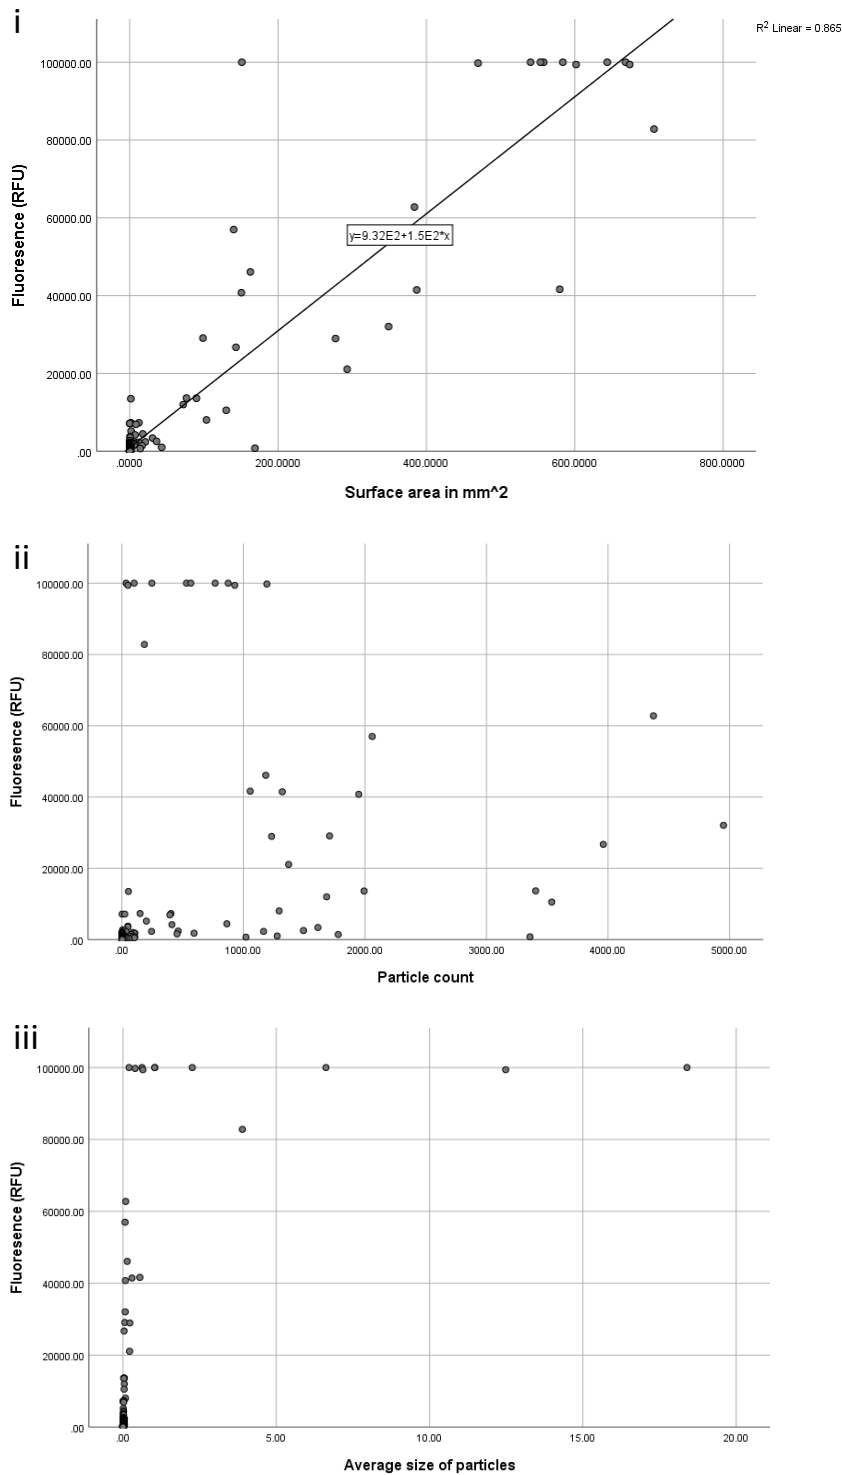

Figure S1. Correlation of image analysis data with spectrofluorometric analysis data. (i) Total surface area very strongly correlated ( $r = 0.930$ ,  $n = 244$ ,  $p < 0.001$ ), linear line of best fit shown; (ii) particle count weakly correlated ( $r = 0.344$ ,  $n = 244$ ,  $p < 0.001$ ); (iii) Particle size moderately correlated ( $r = 0.555$ ,  $n = 244$ ,  $p < 0.001$ ). RFU: relative fluorescence units.
